# Supplementary material for: An all-in-one microfluidic SlipChip for power-free and rapid biosensing of pathogenic bacteria
Source: Royal Society of Chemistry journal article supplement (doi:10.1039/d4lc00366g), 2024-01-01
Supplement: d4lc00366g1.pdf [file d4lc00366g1.pdf]

# **An all-in-one microfluidic slipchip for power-free and rapid biosensing of pathogenic bacteria**

Li Xue<sup>1,2</sup>, Ming Liao<sup>3</sup>, Jianhan Lin<sup>1,\*</sup>

<sup>1</sup>Key Laboratory of Agricultural Information Acquisition Technology, Ministry of Agriculture and Rural Affairs, China Agricultural University, Beijing 100083, China

<sup>2</sup>Beijing Key Laboratory of Microanalytical Methods and Instrumentation, Key Laboratory of Bioorganic Phosphorus Chemistry and Chemical Biology (Ministry of Education), Department of Chemistry, Tsinghua University, Beijing, 100084, China

<sup>3</sup>College of Veterinary Medicine, South China Agricultural University, Guangzhou, 510642, China

\*Corresponding author: Dr. Jianhan Lin, Email: [jianhan@cau.edu.cn](mailto:jianhan@cau.edu.cn)

## Table of Contents

|                                                         |           |
|---------------------------------------------------------|-----------|
| <b>Materials.....</b>                                   | <b>3</b>  |
| <b>Culture of bacteria.....</b>                         | <b>4</b>  |
| <b>Preparation of the spiked bacterial samples.....</b> | <b>5</b>  |
| <b>Development of smartphone App.....</b>               | <b>6</b>  |
| <b>Fig. S1.....</b>                                     | <b>7</b>  |
| <b>Fig. S2.....</b>                                     | <b>8</b>  |
| <b>Fig. S3.....</b>                                     | <b>9</b>  |
| <b>Fig. S4.....</b>                                     | <b>10</b> |
| <b>Table S1.....</b>                                    | <b>11</b> |
| <b>Table S2.....</b>                                    | <b>12</b> |
| <b>App Code.....</b>                                    | <b>13</b> |
| <b>References.....</b>                                  | <b>14</b> |

## Materials

Carboxylated MNPs (180 nm) from Allrun Nano (Shanghai, China) were used with the anti-*Salmonella* polyclonal antibody (pAb) from Fitzgerald (Birmingham, AL, USA) for magnetic separation of the target *Salmonella* cells. N-(3-dimethylaminopropyl)-N'-ethylcarbodiimide hydrochloride (EDC) and N-Hydroxysulfosuccinimide sodium (NHSS) from Sigma Aldrich (St. Louis, MO, USA) were used to activate the carboxyl groups on the surface of MNPs. Gold (III) chloride trihydrate ( $\text{HAuCl}_4 \cdot 3\text{H}_2\text{O}$ ), chloroplatinic acid ( $\text{H}_2\text{PtCl}_6 \cdot 6\text{H}_2\text{O}$ ) and Sodium tetrachloropalladate(II) ( $\text{Cl}_4\text{Na}_2\text{Pd}$ ) from Sigma Aldrich, and trisodium citrate and ascorbic acid from Aladdin (Shanghai, China) were used to synthesize the gold@platinum palladium nanocatalysts (Au@PtPd NCs). Anti-*Salmonella* monoclonal antibody (mAb) from Meridian (Memphis, TN, USA) was used to modify the Au@PtPdNCs for labelling the *Salmonella* cells specifically.

Silicone elastomer kit from Dow Corning (Sylgard 184, Auburn, MI, USA) was used for fabricating microfluidic chips. The Objet30 Pro 3D printer from Stratasys (Eden Prairie, MN, USA) was used to fabricate the holder and molds of the microfluidic chips.

## **Culture of the bacteria**

The culture and preparation of the target and non-target bacteria for obtaining a serial dilution of bacterial samples. *Salmonella typhimurium* was used as target bacteria. *Staphylococcus aureus*, *Bacillus cereus*, *E. coli* O157:H7, and *Listeria monocytogenes* were used as the non-target bacteria. All these bacterial strains were stored at -20°C in a glycerol/broth medium (30%, v/v) and re-activated by incubating the bacteria in sterile Luria-Bertani (LB) medium (Aoboxing Biotech, Beijing, China) at 37°C for 16-24 h with shaking at 180 rpm. The bacterial cultures were 10-fold diluted with sterile PBS to obtain the bacteria at the concentrations of 10<sup>1</sup>-10<sup>6</sup> CFU/mL, respectively. Bacterial enumeration was conducted using the standard culture plating. In brief, the bacterial samples were serially 10-fold diluted with sterile PBS, and 100 µL of the diluents were surface plated on the LB agar plates. After incubation at 37°C for 22-24 h, the visible colonies were counted for enumeration of the bacteria.

## Preparation of the spiked bacterial samples

To evaluate the performance of this microfluidic biosensor on *Salmonella* detection in the real food samples, milk and chicken were purchased from a local supermarket and has been confirmed the absence of *Salmonella* using selective culture plating. According to China's food safety national standards (GB 4789.4), 25 g chicken or 25 mL milk was first added into 225 mL sterile PBS in a homogeneous bag. The chicken sample was homogenized using a homegenizer (BagMixer, InterScience, Paris, France) for 5 min, followed by standing for 15 min to obtain the supernatant. Then, pure *Salmonella typhimurium* was mixed with diluted the chicken supernatant or diluted milk to prepare the artificially contaminated the spiked milk and chicken samples with the bacterial concentrations from  $3.0 \times 10^2$  to  $3.0 \times 10^4$  CFU/mL.

## Development of smartphone App

A smartphone (Huawei, Shenzhen, China) with an Android operation system was used in this study. A proprietary App programmed in JAVA was developed and downloaded on the smartphone with two built-in cameras (camera 1's resolution: 20 million pixels; camera 2's resolution: 12 million pixels; sensor: CMOS). First, the image of catalysate was collected using the camera. After the image was uploaded and displayed on the App, its detection area was cropped and processed using the median filter to smooth the selected image. Then, the RGB value of each pixel in the image was obtained and converted to the Hue-Saturation-Lightness (HSL) value through a matrix transformation algorithm (equation 1) and each saturation was extracted. Finally, the average saturation was obtained for each image, and the linear calibration model was built between the saturation of the image and the concentration of the target bacteria.

$$\begin{aligned}
 & \text{max} = \text{MAX} (R, G, B) \\
 & \text{min} = \text{MIN} (R, G, B) \\
 & H = \begin{cases} 0^\circ, & \text{if } \text{max} = \text{min} \\ 60^\circ \times \frac{G - B}{\text{max} - \text{min}} + 0^\circ, & \text{if } \text{max} = R \text{ and } G \geq B \\ 60^\circ \times \frac{G - B}{\text{max} - \text{min}} + 360^\circ, & \text{if } \text{max} = R \text{ and } G < B \\ 60^\circ \times \frac{B - R}{\text{max} - \text{min}} + 120^\circ, & \text{if } \text{max} = G \\ 60^\circ \times \frac{R - G}{\text{max} - \text{min}} + 240^\circ, & \text{if } \text{max} = B \end{cases} \quad (\text{equation 1}) \\
 & S = \begin{cases} 0, & \text{if } L = 0 \text{ or } \text{max} = \text{min} \\ \frac{\text{max} - \text{min}}{\text{max} + \text{min}}, & \text{if } 0 < L \leq \frac{L}{2} \\ \frac{\text{max} - \text{min}}{2 - (\text{max} + \text{min})}, & \text{if } L > \frac{1}{2} \end{cases}
 \end{aligned}$$

$$L = \frac{1}{2}(\text{max} + \text{min})$$



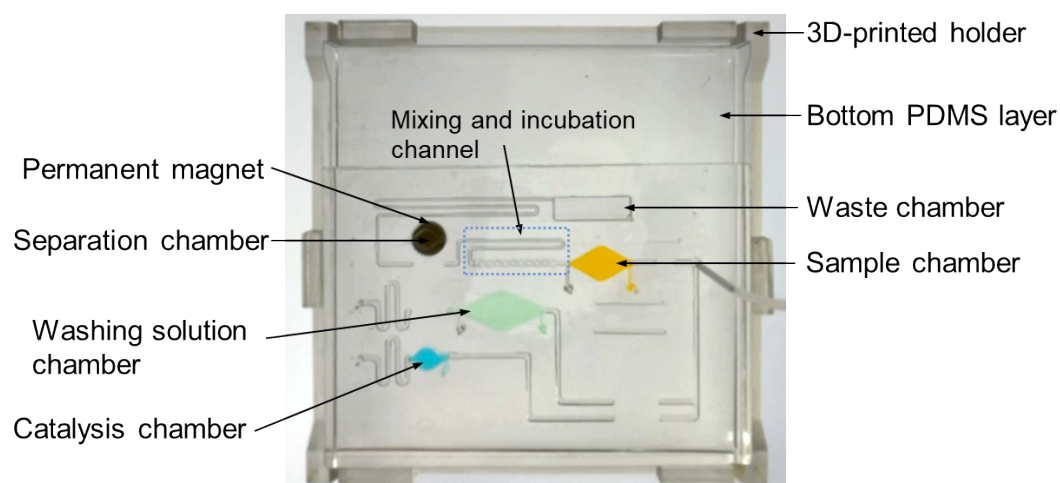

**Fig. S1** Photo of the microfluidic slipchip



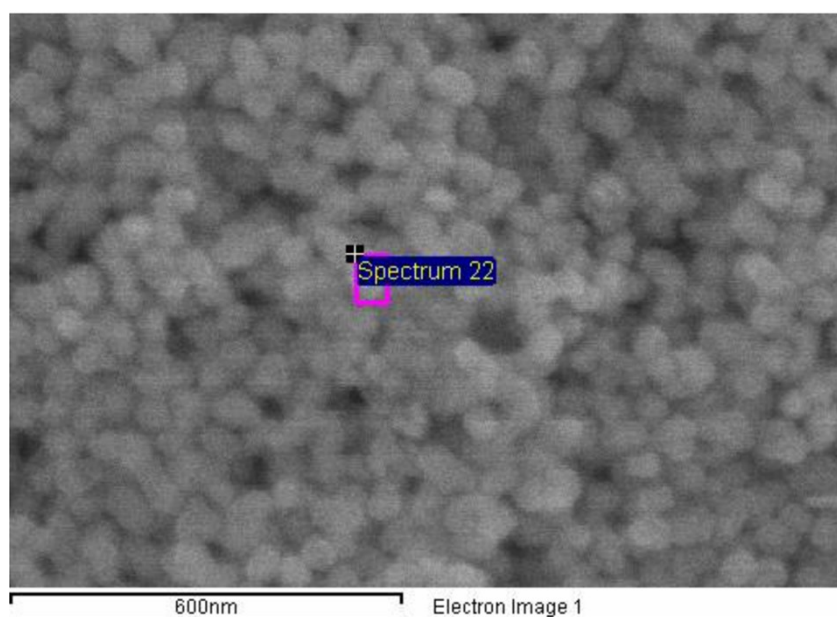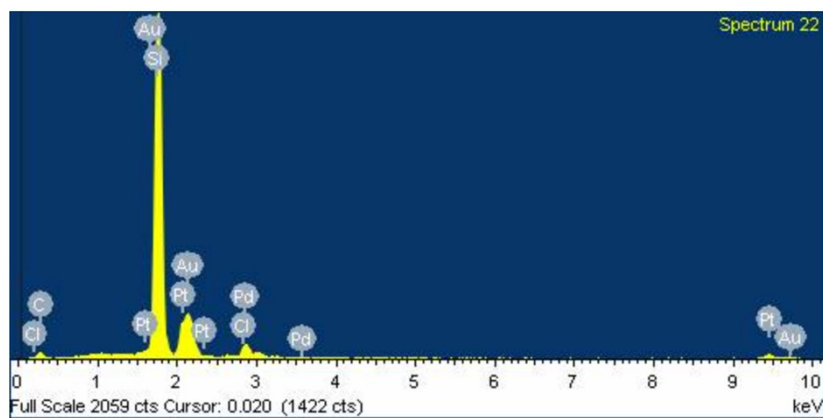

**Fig. S2** The EDS elemental spectrum of Au@PtPd nanocatalysts

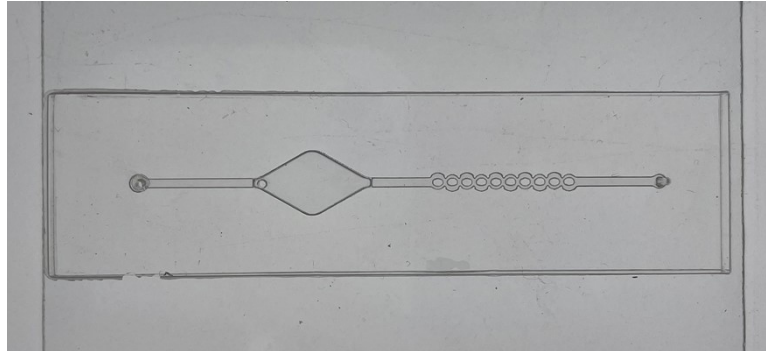

**Fig. S3** Photo of microfluidic chip with the ASAR micromixer

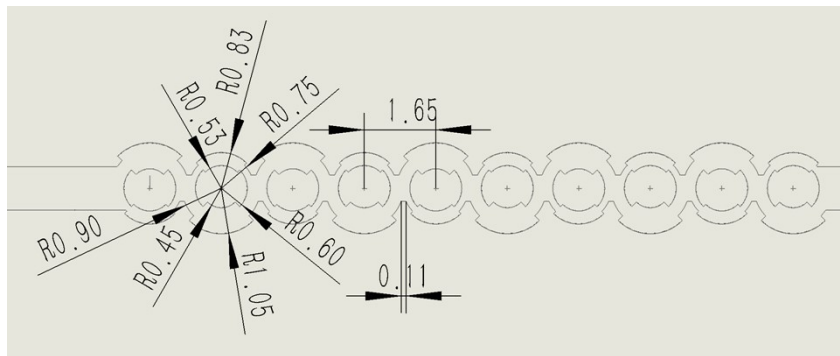

**Fig. S4** The specific design parameters of the ASAR micromixer (unit: mm)

**Table S1.** Cost for all the components of this biosensor.

| <b>Item</b>           | <b>Amounts</b> | <b>Cost (US \$)</b> |
|-----------------------|----------------|---------------------|
| Syringe (1 mL)        | 1              | 0.02                |
| PDMS                  | 1              | 1.0                 |
| Duct                  | 1              | 0.08                |
| Silicon oli           | 1              | 0.01                |
| 3D print holder       | 1              | 0.5                 |
| Magnet                | 1              | 0.05                |
| Magnetic nanobeads    | 1              | 0.50                |
| Au@PtPd nanocatalysts | 1              | 0.05                |
| Antibodies            | 1              | 6.69                |
| Total                 |                | 8.9                 |

**Table S2.** Comparison of this biosensor with other reported microfluidic methods.

| Methods                            | Target                       | Instrument                       | LOD<br>(CFU/mL)    | Linear Range<br>(CFU/mL)                | Total time<br>(h) | References     |
|------------------------------------|------------------------------|----------------------------------|--------------------|-----------------------------------------|-------------------|----------------|
| Electrochemical                    | <i>E. coli</i> O157:H7       | Electrochemical workstation      | 500                | $2 \times 10^3$ - $2 \times 10^5$       | 1.0               | 1              |
| Electrochemical                    | <i>Salmonella</i>            | Impedance analyzer               | 100                | $1.0 \times 10^2$ - $1.0 \times 10^5$   | 2.0               | 2              |
| SERS                               | <i>E. coli</i> O157:H7       | Raman Spectrometer               | 30                 | -                                       | -                 | 3              |
| SPR                                | <i>Staphylococcus aureus</i> | Spectrophotometer                | $10^3$             | -                                       | 1.0               | 4              |
| Fluorescent                        | <i>Salmonella</i>            | microplate reader                | $4.9 \times 10^3$  | $4.9 \times 10^3$ - $4.9 \times 10^7$   | 3.5               | 5              |
| Fluorescent                        | <i>Salmonella</i>            | Inverted fluorescence microscope | 50                 | $50$ - $10^5$                           | 5.0               | 6              |
| Fluorescent<br>(RCA-CRISPR/Cas12a) | <i>Salmonella</i>            | Smartphone                       | $1.93 \times 10^2$ | $1.93 \times 10^2$ - $1.93 \times 10^8$ | ~3.0              | 7              |
| Colorimetric                       | <i>Salmonella</i>            | microplate reader                | $3 \times 10^2$    | $1.0 \times 10^4$ - $1.0 \times 10^6$   | 1.0               | 8              |
| Colorimetric                       | <i>Salmonella</i>            | Smartphone                       | 276                | $10^3$ - $10^8$                         | ~1.0              | 9              |
| Colorimetric                       | <i>Salmonella</i>            | smartphone                       | 101                | $2.0 \times 10^2$ - $2.0 \times 10^5$   | 0.5               | This biosensor |

SERS: Surface-enhanced Raman spectroscopy. SPR: Surface plasmon resonance. RCA: rolling circle amplification.

```

1  App Code:
2
3  int ddw = iv_image.getDrawable().getBounds().width();
4  int ddh = iv_image.getDrawable().getBounds().height();
5  int TotalPxiel = ddw * ddh;
6  int TotalR = 0, TotalG = 0, TotalB = 0;
7
8  for (int i = 0; i <= ddw - 1; i++) {
9      for (int j = 0; j <= ddh - 1; j++) {
10         TotalR += Color.red(bitmap.getPixel(i, j));
11         TotalG += Color.green(bitmap.getPixel(i, j));
12         TotalB += Color.blue(bitmap.getPixel(i, j));
13     }
14 }
15 float averageR = (float) (TotalR/TotalPxiel)/255, averageG = (float) (TotalG/TotalPxiel)/255, averageB =
16 (float) (TotalB/TotalPxiel)/255;
17 float max = MAX(averageR, averageG, averageB);
18 float min = MIN(averageR, averageG, averageB);
19 float L = (max + min)/2;
20 float S;
21 if(L > 0.5) { S = (max - min)/(max + min);}
22 else { S = (max - min)/(2 - max - min);}
23 float h;
24 if(averageR == max) { h = (averageG - averageB)/(max - min);}
25 else if(averageG == max) { h = 2 + (averageB - averageR)/(max - min);}
26 else { h = 4 + (averageR - averageG)/(max - min);}
27 float H;
28 if(h >= 0) { H = h * 60;}
29 else H = 360 + h * 60;
30
31 for (int count = 1; count <= 3; count++) for (int i = 1; i < bitmap.getWidth()-1; i++) {
32     for (int j = 1; j < bitmap.getHeight() - 1; j++) {
33         int Array[] = {bitmap.getPixel(i- 1, j- 1), bitmap.getPixel(i- 1, j), bitmap.getPixel(i, j- 1),
34         bitmap.getPixel(i, j), bitmap.getPixel(i- 1, j+ 1), bitmap.getPixel(i+ 1, j- 1),
35         bitmap.getPixel(i+ 1, j), bitmap.getPixel(i, j+ 1), bitmap.getPixel(i+ 1, j+ 1),};
36
37         int result = ChoiceSort(Array, 9);
38         count++;
39         bitmap.setPixel(i, j, result);
40     }
41 }
42 }
43 int ChoiceSort(int arr[], int n) {
44     for (int i = 0; i < n; i++){
45         int m = i;
46         for (int j = i + 1; j < n; j++){
47             if(arr[j] < arr[m]) {
48                 m = j;
49             }
50         }
51         if(i != m) {
52             int t = arr[i];
53             arr[i] = arr[m];
54             arr[m] = t;
55         }
56     }
57     return arr[4];
58 }
59
60

```

## 61 References

- 62 1. R. Wang, Y. Xu, T. Sors, J. Irudayaraj, W. Ren and R. Wang, *Mikrochim Acta*, 2018, **185**, 184.  
63 2. L. Wang, L. Xue, R. Guo, L. Zheng, S. Wang, L. Yao, X. Huo, N. Liu, M. Liao, Y. Li and J. Lin,  
64 *Poult Sci*, 2020, **99**, 1606-1614.  
65 3. S. Asgari, R. Dhital, S. A. Aghvami, A. Mustapha, Y. Zhang and M. Lin, *Mikrochim Acta*, 2022,  
66 **189**, 111.  
67 4. H. Khateb, G. Klos, R. L. Meyer and D. S. Sutherland, *ACS Appl Bio Mater*, 2020, **3**, 3066-3077.  
68 5. S. Ding, H. Hu, X. Yue, K. Feng, X. Gao, Q. Dong, M. Yang, U. Tamer, G. Huang and J. Zhang,  
69 *J Dairy Sci*, 2022, **105**, 2895-2907.  
70 6. X. An, P. Zuo and B. C. Ye, *Talanta*, 2020, **209**, 120571.  
71 7. X. Xiang, G. Xing, Y. Liu, Q. Wen, Y. Wei, J. Lu, Y. Chen, Y. Ji, S. Chen, T. Liu and Y. Shang,  
72 *J Agric Food Chem*, 2023, **71**, 13518-13526.  
73 8. J. Hu, F. Tang, L. Wang, M. Tang, Y.-Z. Jiang and C. Liu, *Sensors and Actuators B: Chemical*,  
74 2021, **346**.  
75 9. Y. Shang, G. Xing, H. Lin, S. Chen, T. Xie and J. M. Lin, *Analytical chemistry*, 2023, **95**, 13368-  
76 13375.  
77
